# Supplementary material for: Quick synthesis, functionalization and properties of uniform, luminescent LuPO4-based nanoparticles
Source: Royal Society of Chemistry journal article supplement (doi:10.1039/c5ra05305f), 2015-01-01
Supplement: c5ra05305f1.pdf [file c5ra05305f1.pdf]

Supplementary information

**Quick synthesis, functionalization and properties of uniform,  
luminescent LuPO<sub>4</sub>-based nanoparticles.**

*Ana I. Becerro\* and Manuel Ocaña*

*Instituto de Ciencia de Materiales de Sevilla (CSIC-University of Seville).  
c/ Américo Vespucio, 49. 41092 Seville (Spain).*

\* Corresponding author. E-mail address: [anieto@icmse.csic.es](mailto:anieto@icmse.csic.es). Tel no: +34 95448945.

Fax no: 954460165

Figure S1

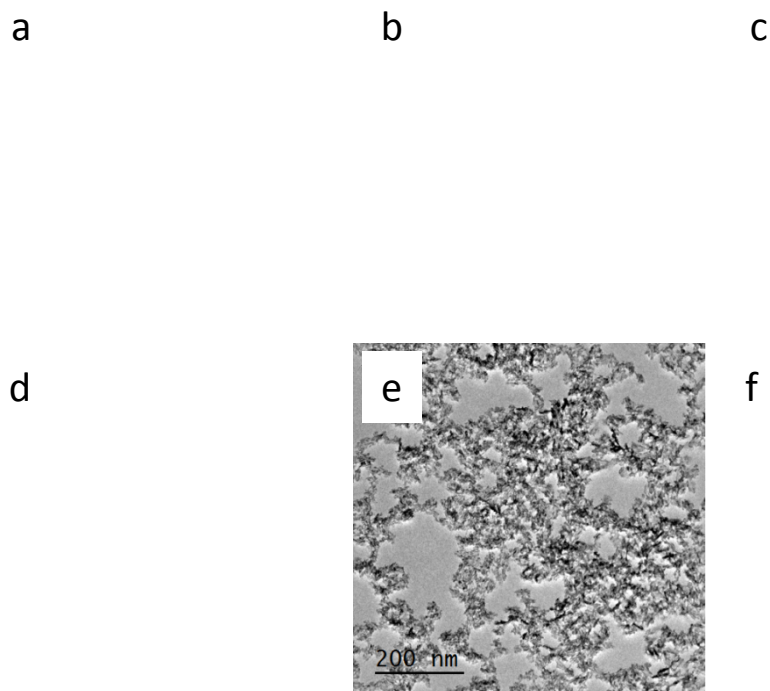

TEM micrographs of the particles obtained after changing only one of the parameters (Lutetium acetate (0.025 M), H<sub>3</sub>PO<sub>4</sub> (0.1 M), butylene glycol (total volume 5 mL), 180°C, 30 min) necessary to obtain the elongated LuPO<sub>4</sub> nanoparticles shown in Figure 1 of the paper. Parameters changes: a) Lutetium source: Lutetium acetyl acetonate; b) Lutetium acetate concentration: 0.01 M; c) Phosphate source: [BMIM] PO<sub>4</sub>; d) H<sub>3</sub>PO<sub>4</sub> concentration = 0.05 M; e) Solvent: Glycerol, f) Solvent: ethylene glycol.

Figure S2

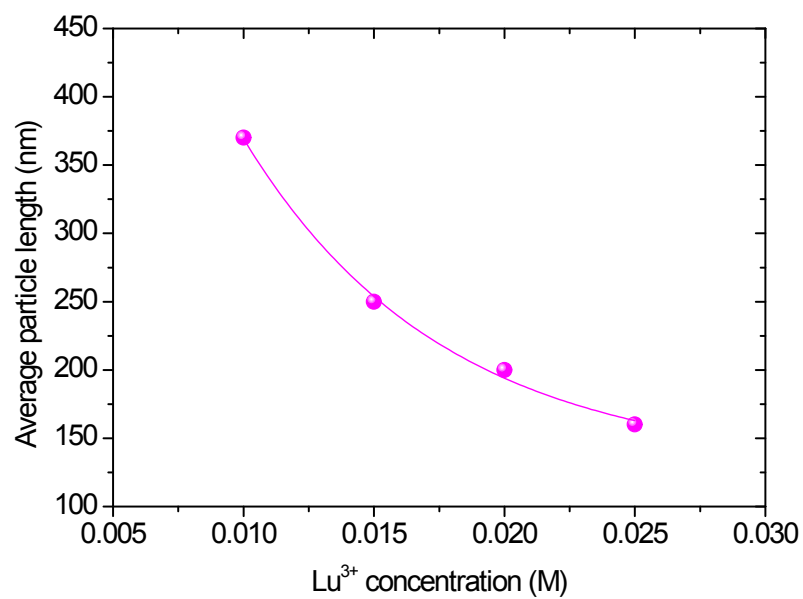

Average particle length versus concentration of Lutetium acetate used in the synthesis of  $\text{LuPO}_4$  particles. The rest of synthesis conditions are identical to those given in Figure 1 of the paper.

Figure S3

TEM micrograph of  $\text{LuPO}_4$  particles doped with 15%  $\text{Eu}^{3+}$  obtained in the conditions described in Figure 1 of the paper.

Figure S4

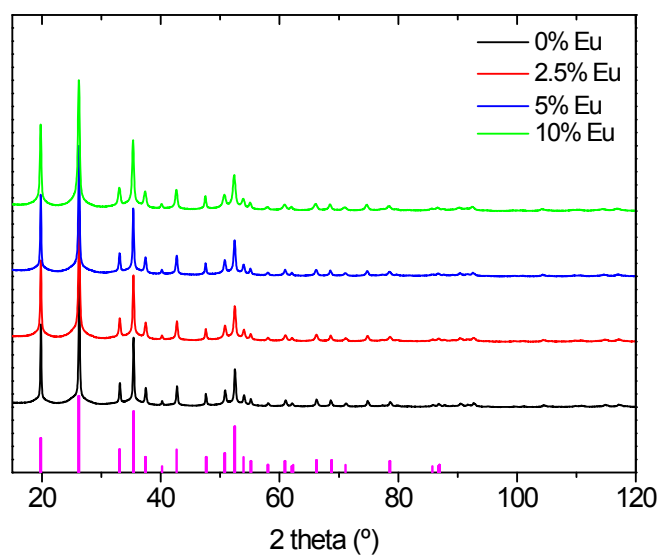

XRD patterns of LuPO<sub>4</sub> nanoparticles doped with different Eu<sup>3+</sup> contents
